# Supplementary material for: Inhibitory Effects of Cinnamaldehyde Derivatives on Biofilm Formation and Virulence Factors in Vibrio Species
Source: MDPI journal article supplement (doi:10.3390/pharmaceutics13122176), 2021-12-17
Supplement: s1 [file s1]

## Supplementary Information

# Inhibitory Effects of Cinnamaldehyde Derivatives on Biofilm Formation and Virulence Factors in *Vibrio* Species

Olajide Sunday Faleye <sup>†</sup>, Ezhaveni Sathiyamoorthi <sup>†</sup>, Jin-Hyung Lee <sup>\*</sup> and Jintae Lee <sup>\*</sup>

**Table S1.** Minimum Inhibitory Concentration (MICs) of Cinnamaldehyde and its Derivatives Against *V. parahaemolyticus* and *V. harveyi*.

| Chemical Name        | Structure                                                                            | <i>V. parahaemolyticus</i> | <i>V. harveyi</i> |
|----------------------|--------------------------------------------------------------------------------------|----------------------------|-------------------|
| 4-DimethylaminoCNMA  | 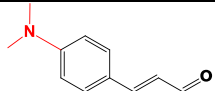   | >500                       | >500              |
| 4-FluoroCNMA         |    | 175                        | 175               |
| 2-NitroCNMA          |    | 250                        | 300               |
| 2-MethoxyCNMA        |   | 175                        | 175               |
| <b>4-ChloroCNMA</b>  |  | 50                         | 50                |
| CNMAoxime            |  | >500                       | >500              |
| <b>4-NitroCNMA</b>   |  | 50                         | 50                |
| 4-MethoxyCNMA        |  | 300                        | 275               |
| <b>4-BromoCNMA</b>   |  | 50                         | 50                |
| $\alpha$ -MethylCNMA |  | >500                       | >500              |
| <b>CNMA</b>          |  | 200                        | 200               |

**Table S2.** Primer sequences for qRT-PCR.

| Genes        | Functions                                                                                                    | Primer Sequences                                                                         |
|--------------|--------------------------------------------------------------------------------------------------------------|------------------------------------------------------------------------------------------|
| <i>aphA</i>  | Acid phosphatase AphA;<br>Biofilm, motility                                                                  | 5'-ACACCCAACCGTTCGTGATG-3'<br>5'-GTTGAAGGCGTTGCGTAGTAAG-3'                               |
| <i>cpsA</i>  | EPS production genes                                                                                         | 5'-GCGCACAACGAAGAATATCG-3'<br>5'--3'CCATCTTATCGAGCGTGTCG                                 |
| <i>luxI</i>  | QS regulator                                                                                                 | 5'-GTG GAT GCT GGC GTT TAT TAC -3'<br>5'-TTT GGG AGC ACT CTG TTG AC -3'                  |
| <i>luxS</i>  | Autoinducer binding domain-<br>containing protein; QS                                                        | 5'-GAT GGG ATG TCG CAC TGG TTT-3'<br>5'- ACT TGC TGT TCA GAA GGC GTA-3'                  |
| <i>mshA</i>  | Type IV pilin MshA                                                                                           | 5'-GGTTTCGTTTAGGTCACG -3'<br>5'-CGTCGAAATGTCGGCGG-3'                                     |
| <i>opaR</i>  | Transcriptional regulator OpaR;<br>QS                                                                        | 5'-TGTCTACCAACCGCACTAACC-3'<br>5'-GCTCTTTCAACTCGGCTTCAC-3'                               |
| <i>oxyR</i>  | DNA-binding transcriptional<br>regulator OxyR; regulator of<br>growth, biofilm formation and<br>motility     | 5'-TCG TCA GCT AGA GGA AGG-3'<br>5'-TGG TCG CGT AAG CAA TGC-3'                           |
| <i>tnaA</i>  | Tryptophanase                                                                                                | 5'-TGA AGA AGT TGG TCC GAA TAA<br>CGT G-3'<br>5'-CTT TGT ATT CTG CTT CAC GCT GCT<br>T-3' |
| <i>qsvR</i>  | <del>an</del> AraC-type transcriptional<br>regulator QsvR; QS regulator to<br>control virulence              | 5'-TAC ACC GCC ACC CAT AAC G-3'<br>5'-AGC CAT TCT CGC CAG GTA TG-3'                      |
| <i>fliA</i>  | Motility/Chemotaxis                                                                                          | 5'-TAAGCGTATTGCTCACCACCT-3'<br>5'-GCTCGCACCTTTAGAACCAT-3'                                |
| <i>tdh</i>   | Thermostable direct hemolysin<br>(TDH)                                                                       | 5'-GTAAAGGTCTCTGACTTTTGGAC-3'<br>5'-TGGAATAGAACCTTCATCTTCACC-3'                          |
| <i>vopS</i>  | T3SS effector adenosine<br>monophosphate-protein<br>transferase VopS; virulence<br>genes (secretion systems) | 5'-AAGGTAGGGCAACGCAAAGA-3'<br>5'-AGCAGCACGACAGCAATACT-3'                                 |
| <i>vmrA</i>  | Sodium-coupled multidrug<br>efflux MATE transporter VmrA                                                     | 5'-GGTGTGTGTTTCGTGGTATTG-3'<br>5'-CTTGATGCTCGGTTCTACTG-3'                                |
| <i>vmeB</i>  | Multidrug efflux RND<br>transporter permease subunit<br>VmeB                                                 | 5'-CTGCGACCATTACACTGACTT-3'<br>5'-GTGTGTAAAGTCTGGATCGTC-3'                               |
| <i>ef-Tu</i> | Elongation factor Tu                                                                                         | 5'-CACTAAACGGCGAAGAGCA-3'<br>5'-CCACGACCTTGGATTGAGAA-3'                                  |
| <i>fadL</i>  | Long-chain fatty acid outer<br>membrane<br>channel/bacteriophage T2<br>receptor                              | 5'-ACGATAAAGGTCAGGAAATCAC-3'<br>5'-GTATTGGATGCTGTAATGTACGG-3'                            |
| <i>nusA</i>  | Transcription termination factor<br>NusA                                                                     | 5'-TGTTTATCACTCGTTCTAAGCCT-3'<br>5'-GTTTGTCAATTTGTTTTCCTGCG-3'                           |
| 16S rRNA     | Housekeeping gene                                                                                            | 5'-TATCCTTGTGTTGCCAGCGAG-3'<br>5'-CTACGACGCACTTTTTGGGA-3'                                |

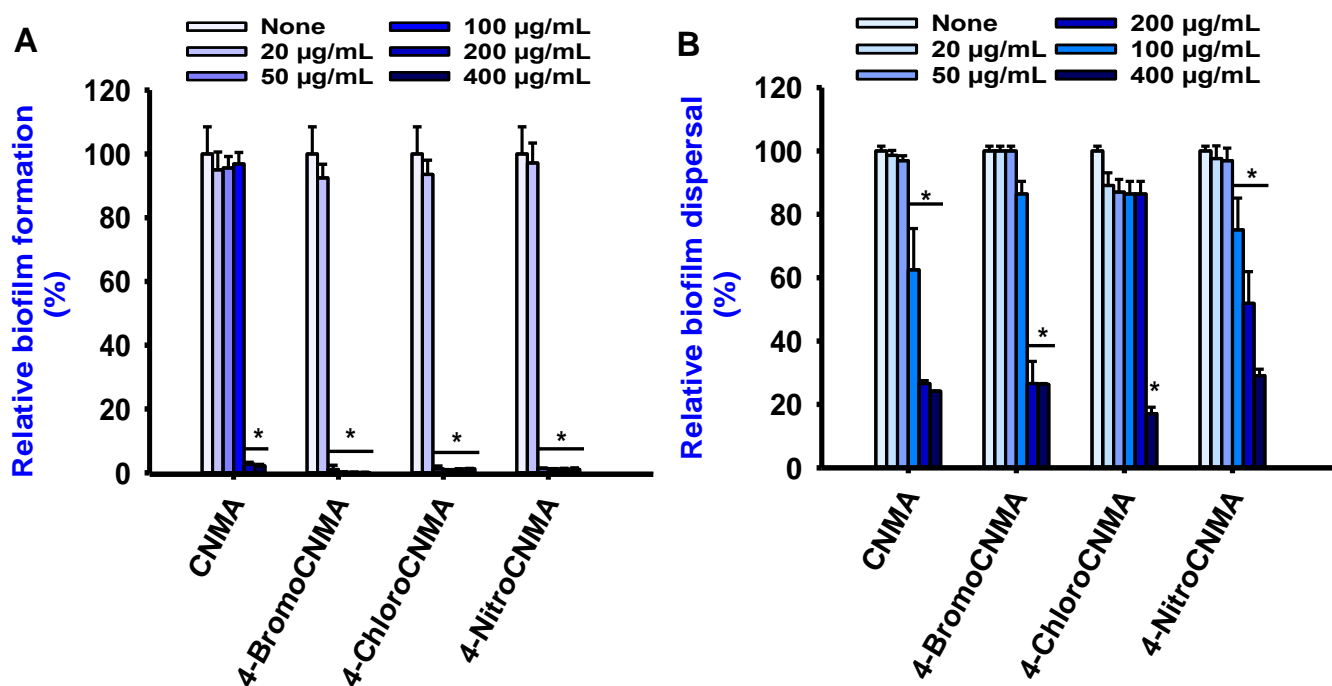

**Figure S1.** Antibiofilm activity of CNMA and its derivatives (A) and biofilm dispersing effects of CNMA and its derivatives against *V. parahaemolyticus* (B), \* denotes a significant difference at  $p < 0.05$ .
